# Supplementary material for: Development of multiple reaction monitoring assay for quantification of carnosine in human plasma
Source: PubMed Central journal article supplement — RSC Adv. 2020 Jan 2;10(2):763–9. doi: 10.1039/c9ra08532g (PMC9047520; doi:10.1039/c9ra08532g), 2020-01-02
Supplement: RA-010-C9RA08532G-s001.pdf [file RA-010-C9RA08532G-s001.pdf]

## Supplementary Figures

**Fig. S1 A.** Full scan MS/MS profile of carnosine. The MS/MS spectrum depicting fragment ion of carnosine at medium collision energy (25 V). **S1B.** The MRM chromatogram of three precursor ions ( $m/z$  210.1, 227.2, 249.1)

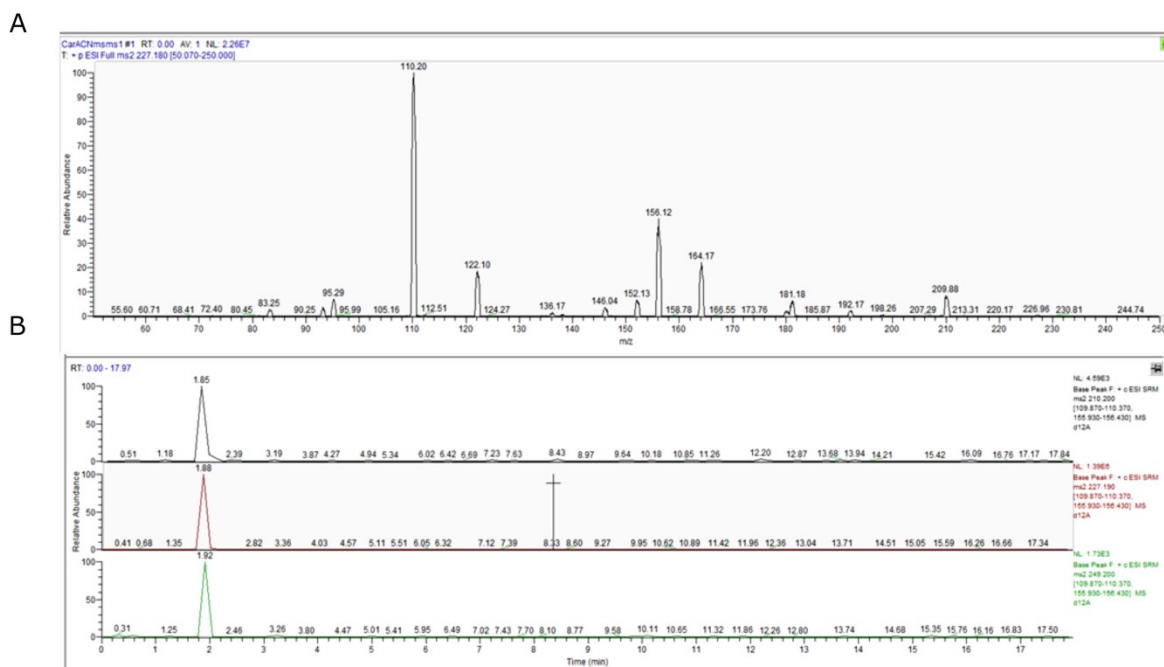

**Fig. S2 A-F. MRM chromatogram of carnosine at different concentrations.** Out of 15 different concentrations of carnosine analyzed for the standard curve, chromatograms for six concentrations were depicted with peak areas in panel A to F.

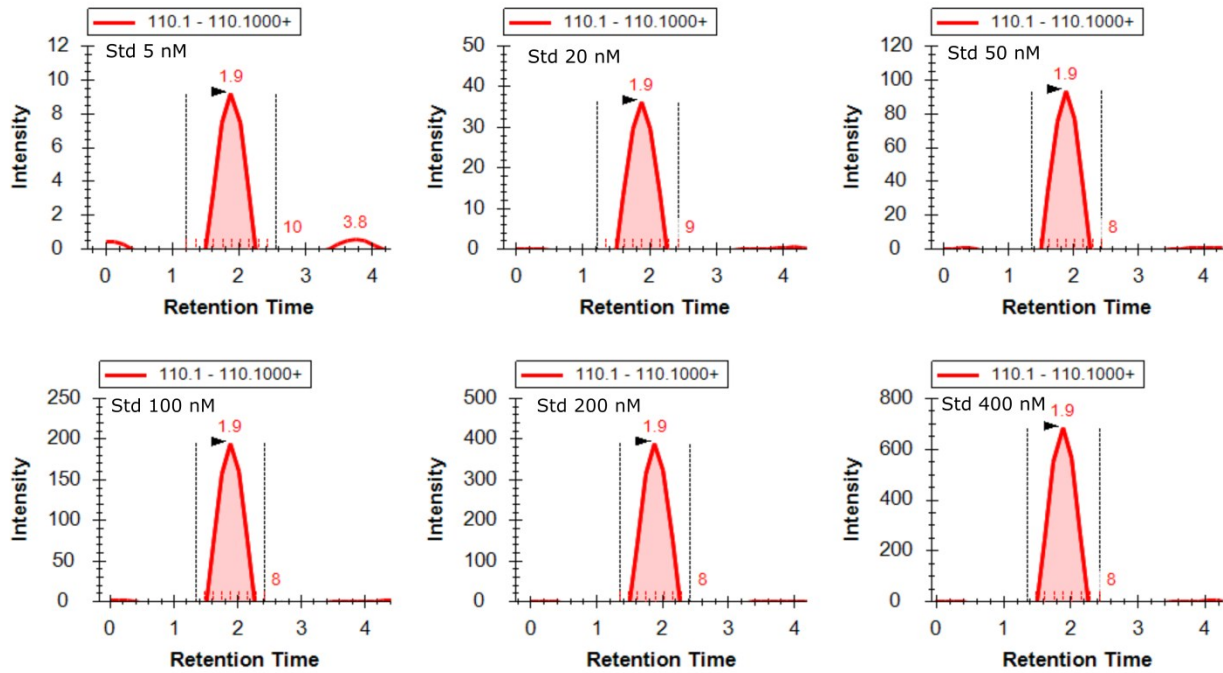

**Fig. S3 A-F. Elution of standard carnosine fragments and their retention time in MRM analysis.** Fig. A, C, and E shows intensity of precursors with m/z 227.2, 210.2 and 249.2 respectively. Fig. B, D, and F shows retention time of the fragments for these three precursors.

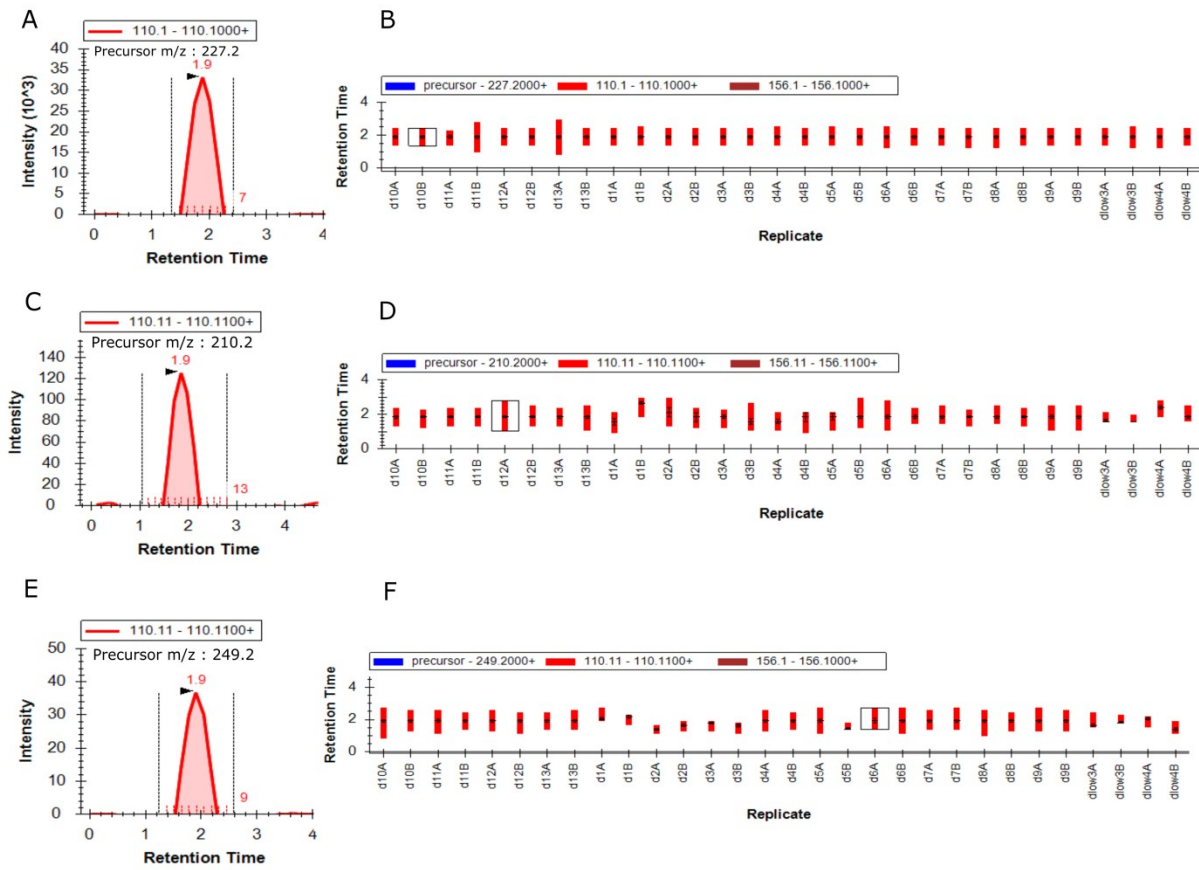

**Fig. S4 A-F. Elution of carnosine fragments in plasma samples and their retention time in MRM analysis.** Fig. A, C, and E shows intensity of precursors with m/z 227.2, 210.2 and 249.2 respectively. Fig. B, D, and F shows retention time of the fragments for these three precursors.

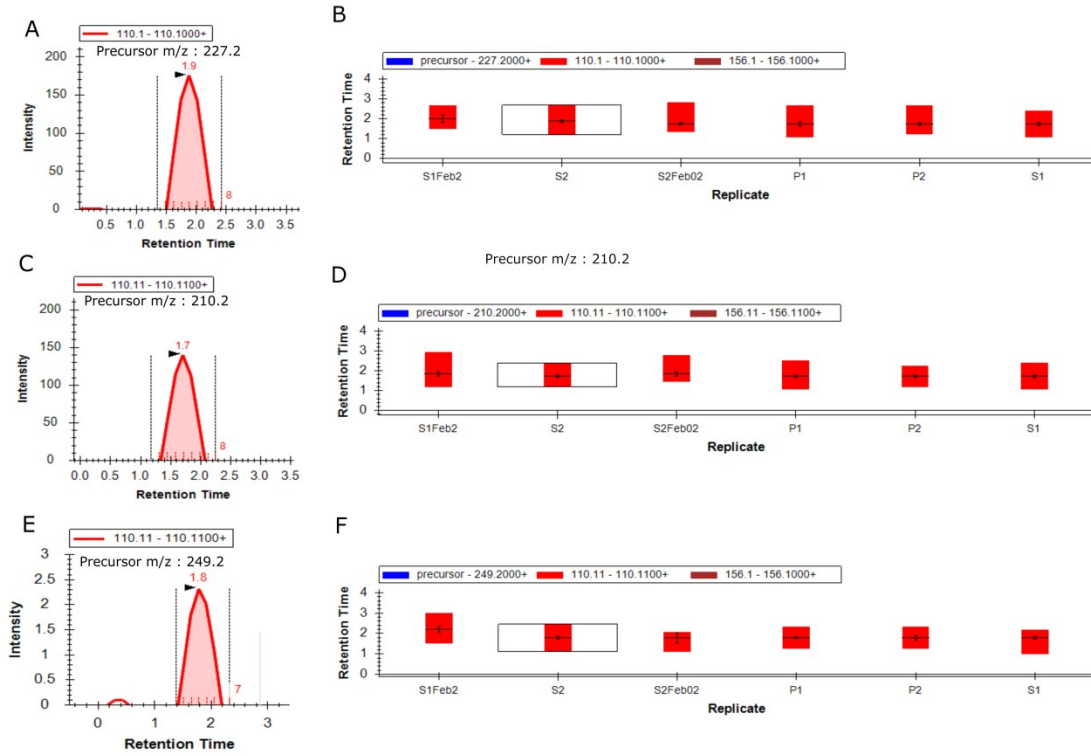

**Fig S5. SDS-PAGE image of CN1 and CN2.** The affinity purified proteins were separated on 12 % SDS-PAGE and stained with coomassie brilliant blue (CBB).

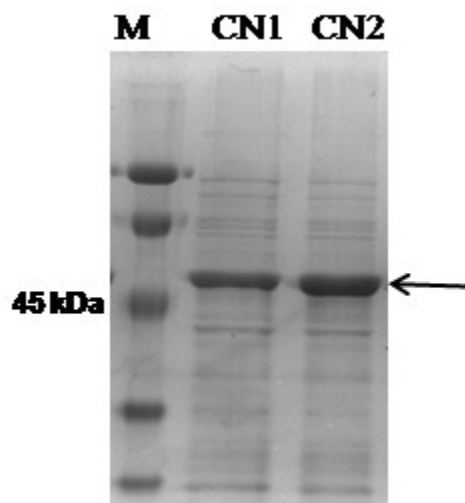

**Fig. S6.** Scheme of carnosine hydrolysis by human carnosinases (CN1 and CN2).

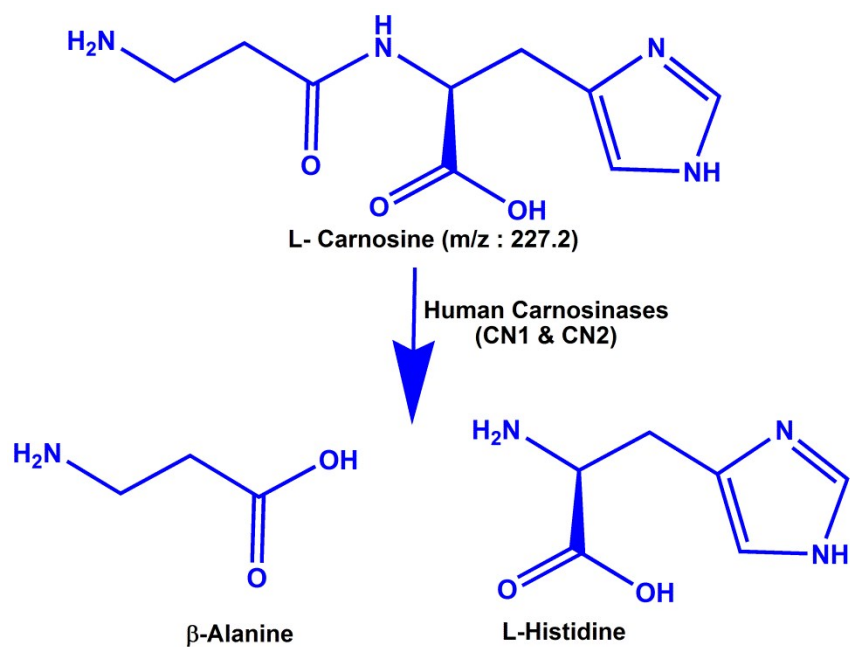

**Supplementary Table: S1. Details of standard curve of carnosine.**

| <b>C<sup>a</sup> (nM)</b> | <b>Average AUC</b> | <b>Standard Deviation</b> | <b>SEM<sup>b</sup></b> | <b>% SEM</b> |
|---------------------------|--------------------|---------------------------|------------------------|--------------|
| 1.00                      | 1205.67            | 95.00                     | 54.85                  | 4.55         |
| 5.00                      | 3018.77            | 392.63                    | 226.69                 | 7.51         |
| 20.00                     | 13852.95           | 647.05                    | 373.58                 | 2.70         |
| 50.00                     | 44156.26           | 8646.89                   | 4992.28                | 11.31        |
| 100.00                    | 71905.76           | 6176.29                   | 3565.88                | 4.96         |
| 200.00                    | 155853.13          | 10223.73                  | 5902.67                | 3.79         |
| 400.00                    | 300122.35          | 12102.79                  | 6987.55                | 2.33         |
| 700.00                    | 546154.74          | 5706.82                   | 3294.84                | 0.60         |
| 1000.00                   | 760074.88          | 24177.45                  | 13958.85               | 1.84         |
| 1500.00                   | 1200083.86         | 9007.88                   | 5200.70                | 0.43         |
| 2000.00                   | 1566594.83         | 6238.18                   | 3601.62                | 0.23         |
| 3000.00                   | 2482731.83         | 52444.80                  | 30279.02               | 1.22         |
| 4000.00                   | 3301119.86         | 29776.46                  | 17191.44               | 0.52         |
| 8000.00                   | 6466348.67         | 98206.09                  | 56699.31               | 0.88         |
| 15000.00                  | 13794366.53        | 282271.43                 | 162969.49              | 1.18         |

<sup>a</sup>: working concentration of standard carnosine; <sup>b</sup>: standard error of mean
